# Supplementary material for: Dexamethasone Selectively Inhibits Detachment of Metastatic Thyroid Cancer Cells during Random Positioning
Source: MDPI journal article supplement (doi:10.3390/cancers15061641), 2023-03-07

FTC-133 – MMP2

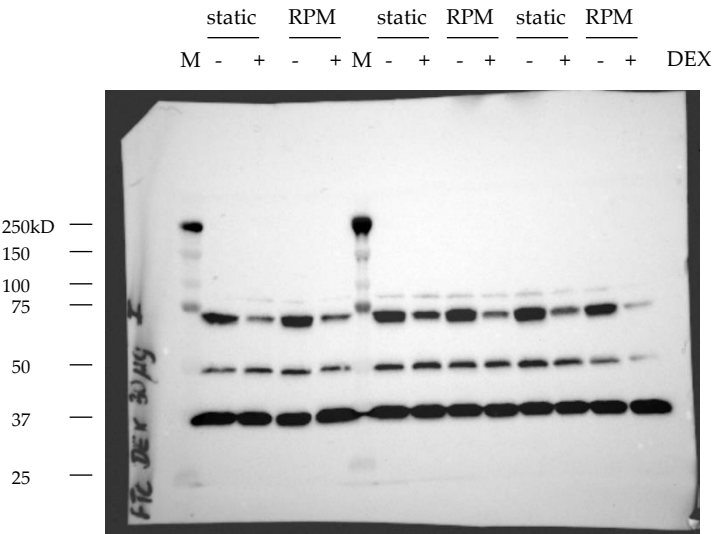

FTC-133 – GAPDH to MMP2

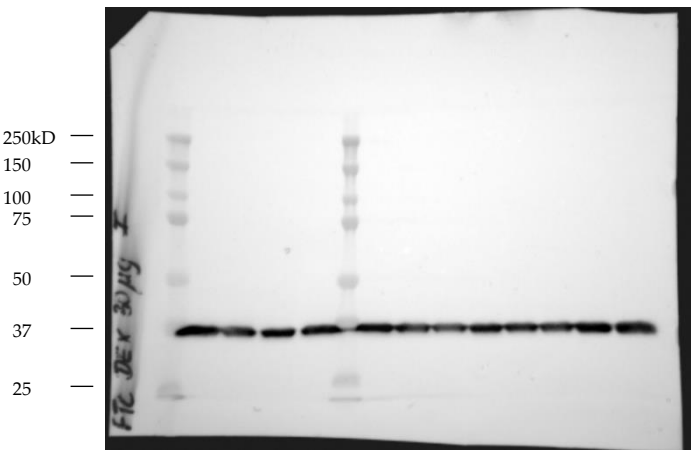

FTC-133 – MMP9

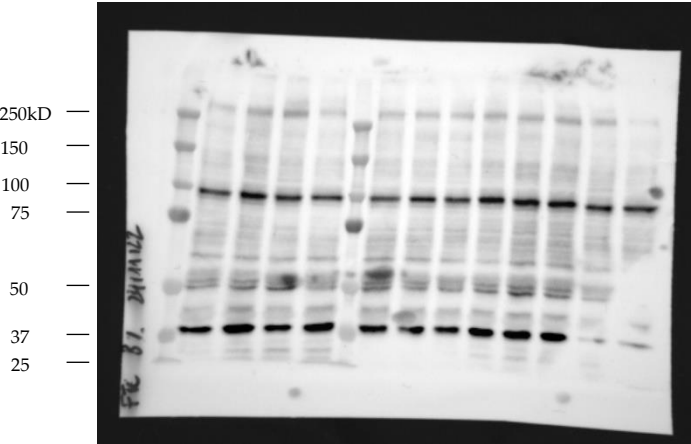

FTC-133 – GAPDH to MMP9

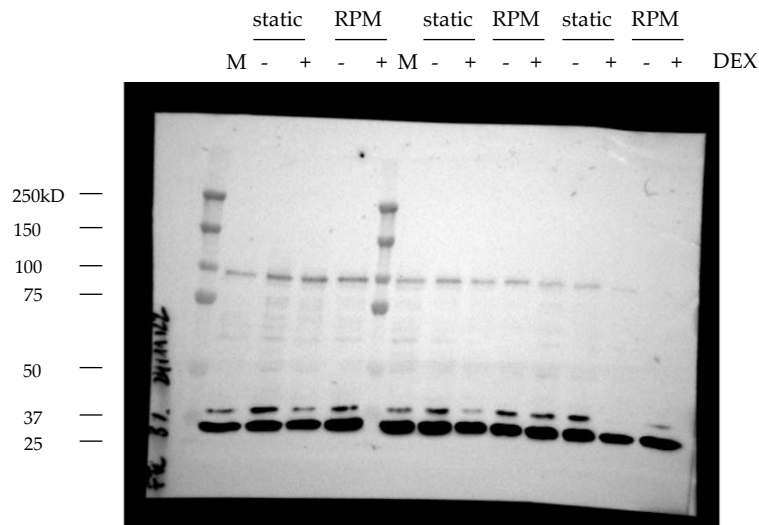

FTC-133 – pGR

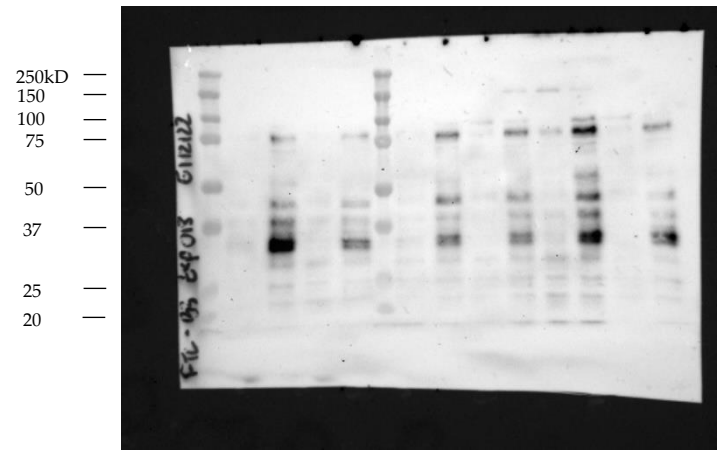

FTC-133 – GAPDH to pGR

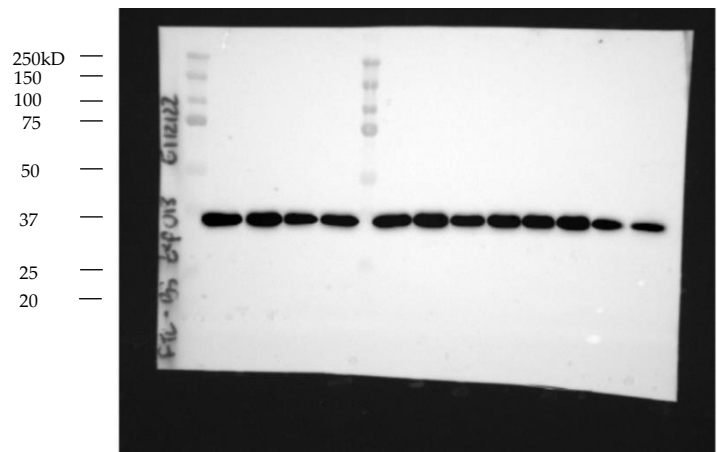

FTC-133 – GR

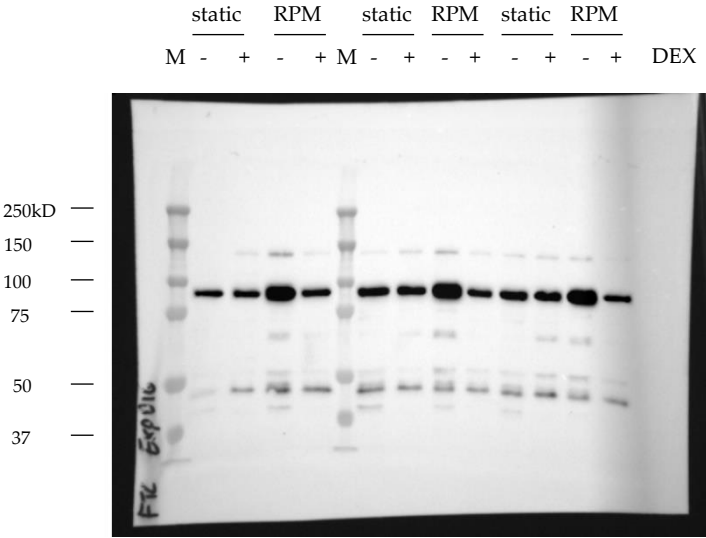

FTC-133 – GAPDH to GR

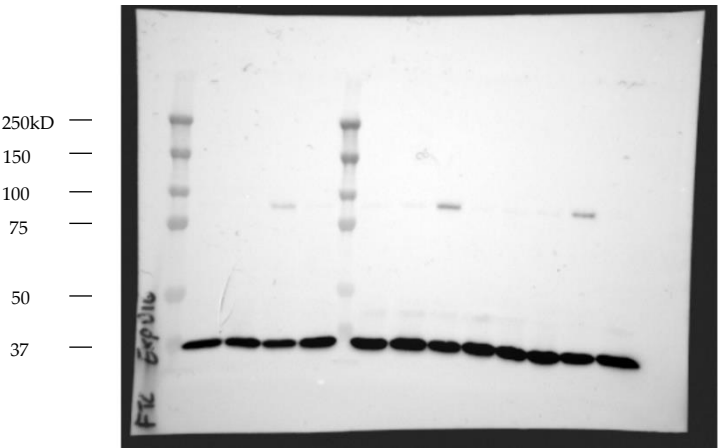

FTC-133 – p38

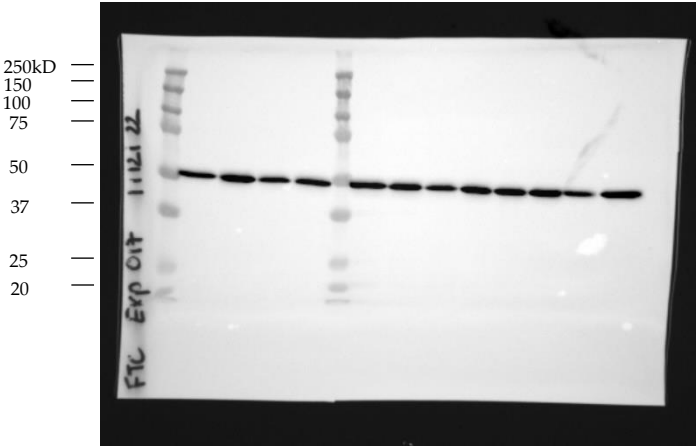

FTC-133 – GAPDH zu p38

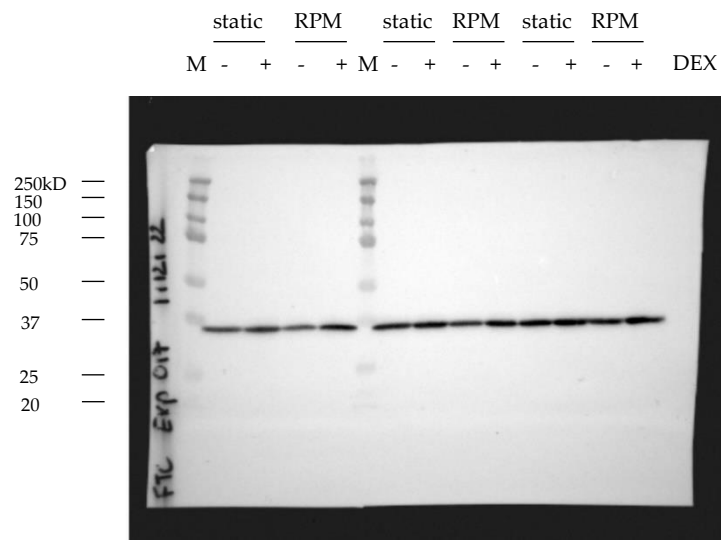

FTC-133 – pp38

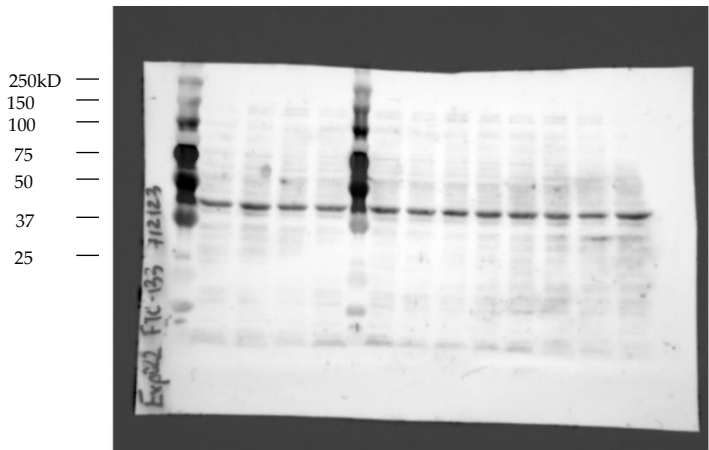

FTC-133 – GAPDH zu pp38

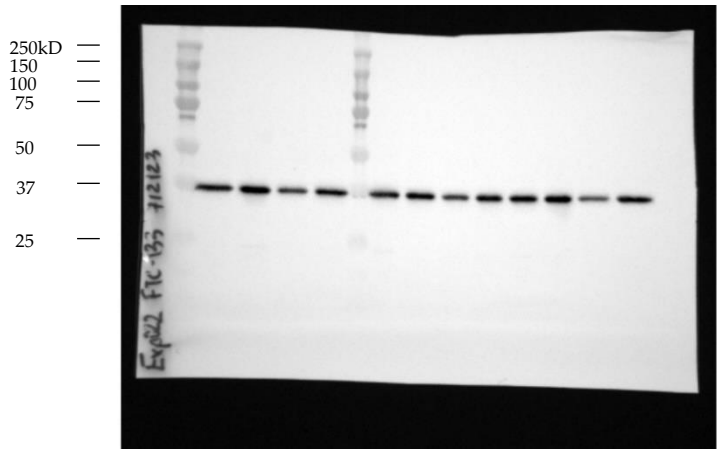

Nthy-ori 3-1 – GR

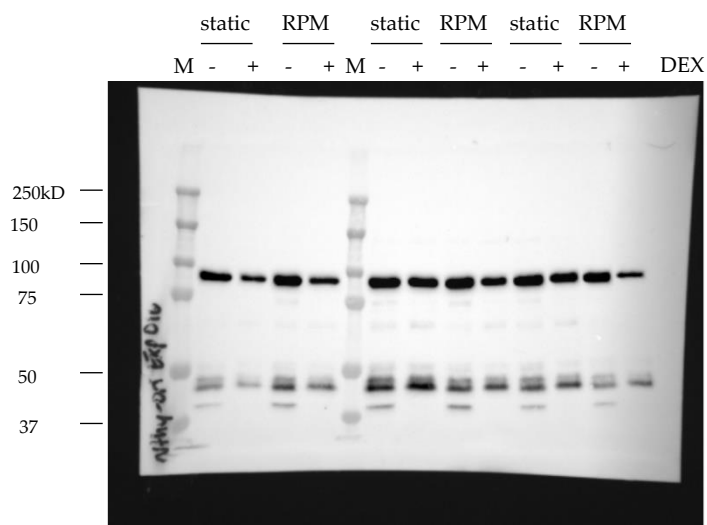

Nthy-ori 3-1 – GAPDH to GR

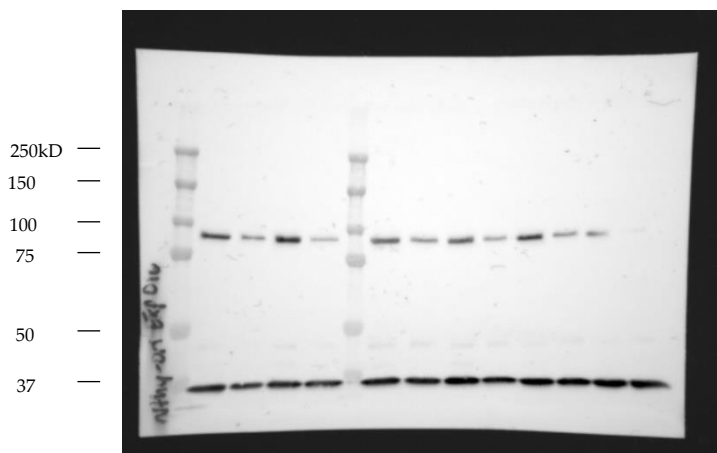

Nthy-ori 3-1 – p38

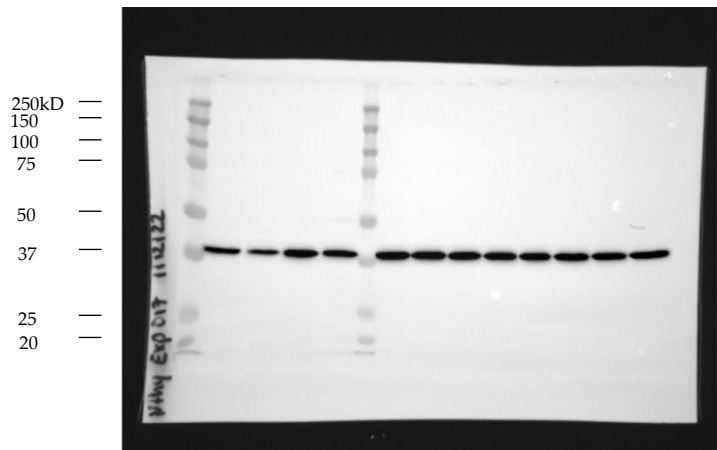

Nthy-ori 3-1 – GAPDH to p38

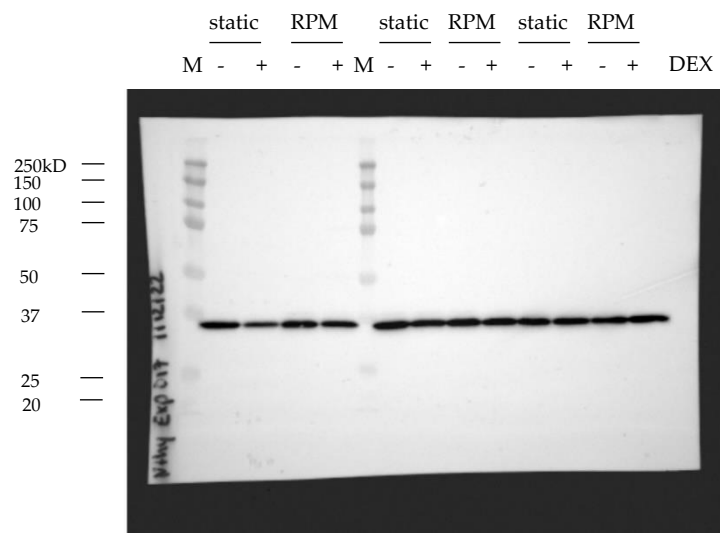

Nthy-ori 3-1 – MMP9

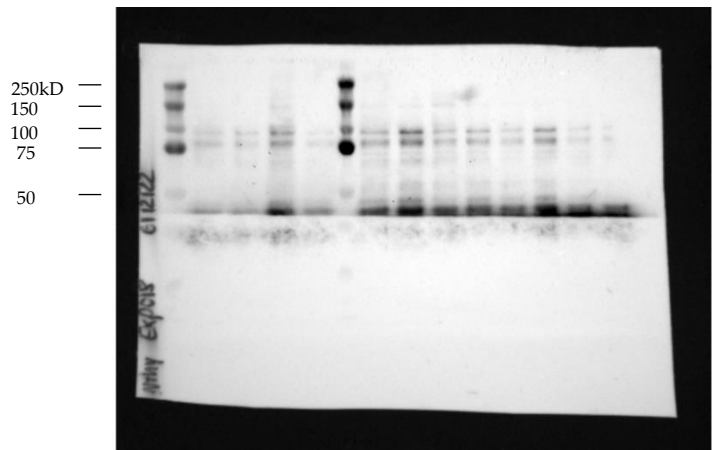

Nthy-ori 3-1 – pGR

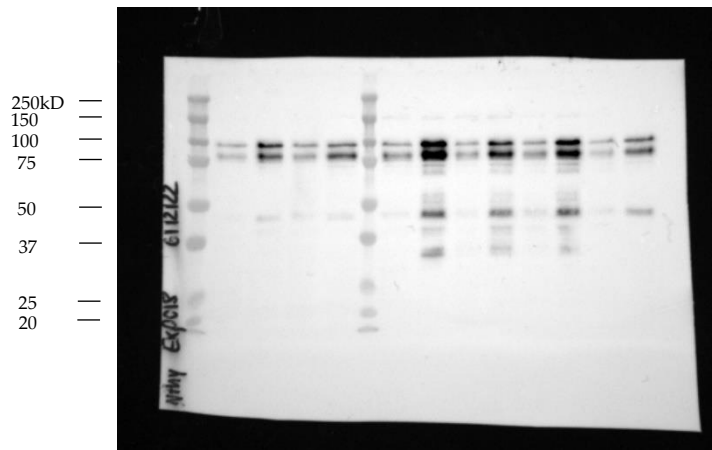

Nthy-ori 3-1 – GAPDH to MMP9 and pGR

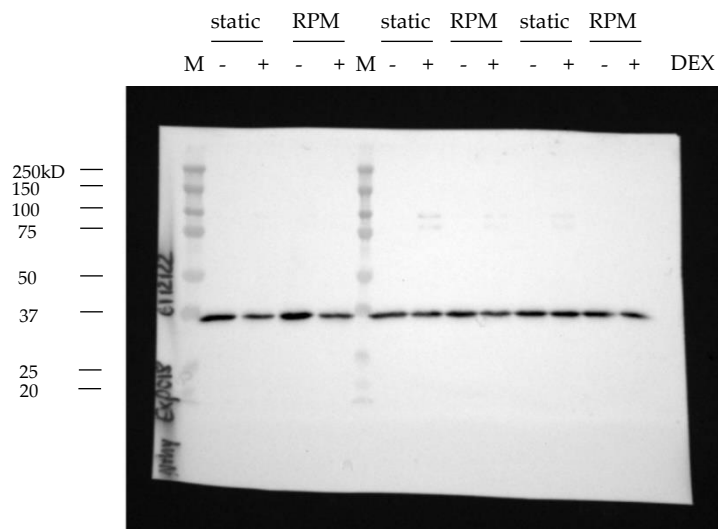

Nthy-ori 3-1 – pp38

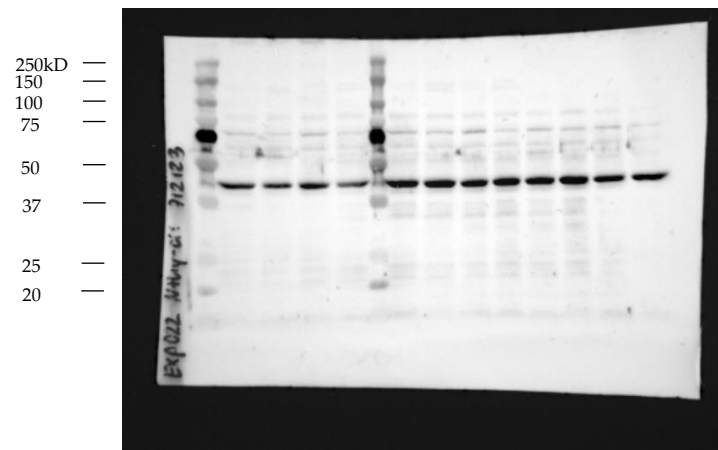

Nthy-ori 3-1 – GAPDH to pp38

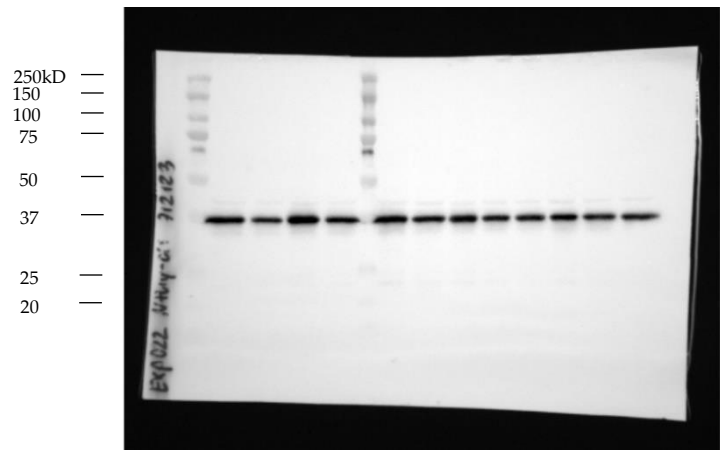

Nthy-ori 3-1 – MMP2

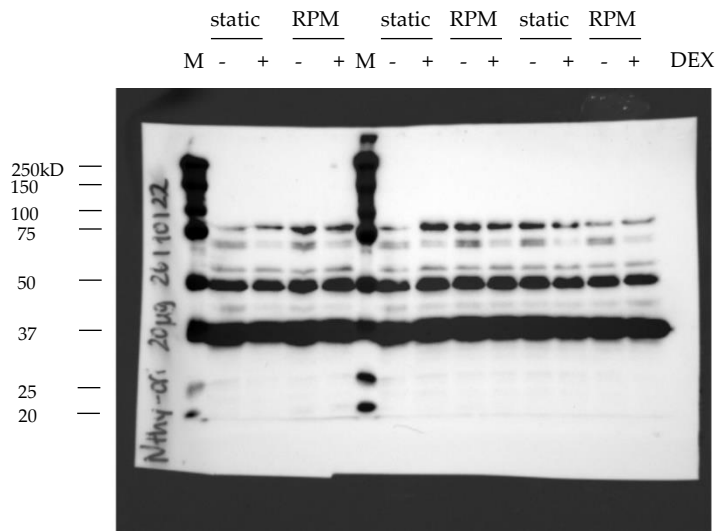

Nthy-ori 3-1 – GAPDH to MMP2

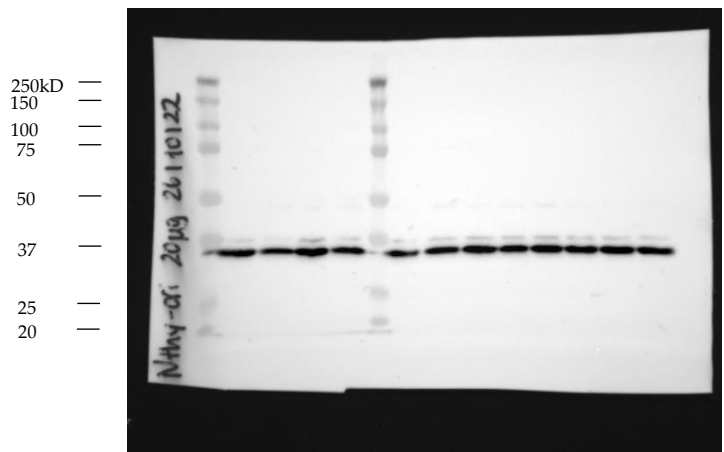

Supplement: s1 [file s1]
