# Supplementary material for: Dexamethasone Selectively Inhibits Detachment of Metastatic Thyroid Cancer Cells during Random Positioning
Source: MDPI journal article supplement (doi:10.3390/cancers15061641), 2023-03-07
Supplement: s1 [file s1]

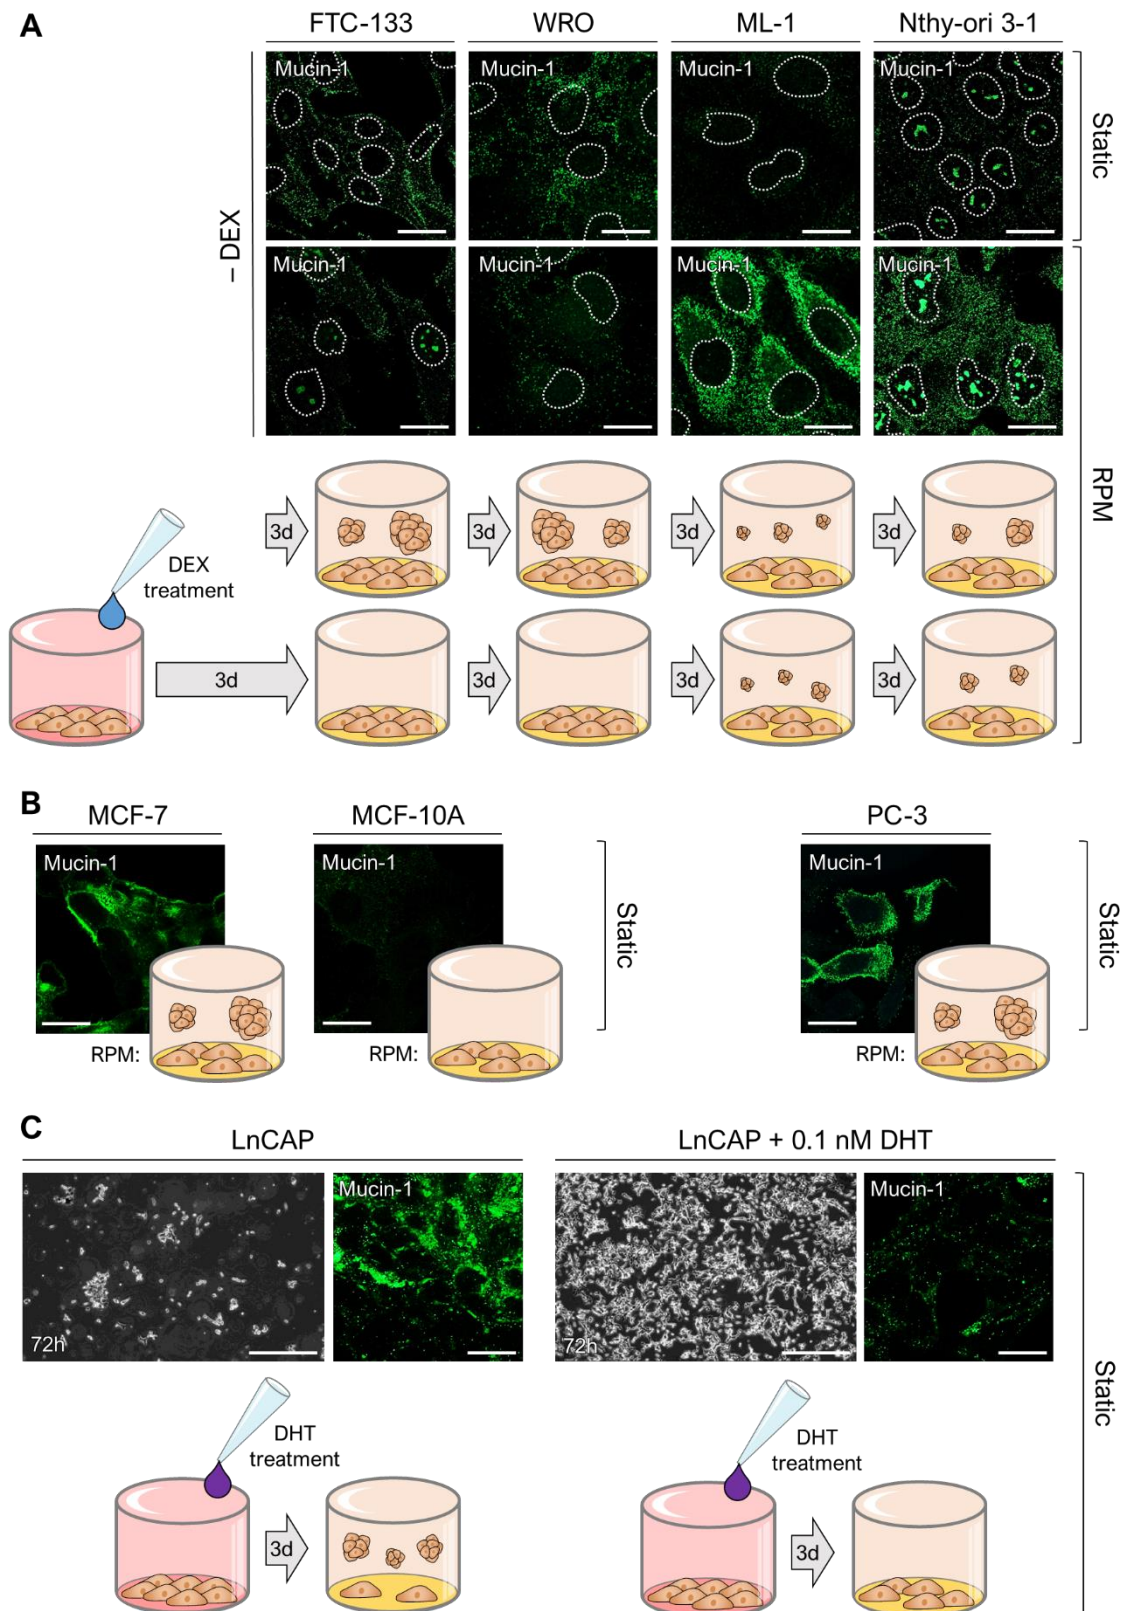

**Figure S2.** Mucin-1 expression in relation to cell adhesion of different cell lines in RPM experiments. **(A)** Immunofluorescence of RPM-induced mucin-1 (green) in adherently growing thyroid (cancer) cells after 72 h. Schematic diagrams show expected spheroid formation in the respective cell cultures; **(B)** Basal mucin-1 expression (green) in other cancer cells studied on the RPM. Schematic diagrams show expected spheroid formation in the respective cell cultures; **(C)** While LnCAP prostate cancer cells in normal RPMI-1640 medium express mucin-1 (green fluorescence) on the RPM and adhere poorly, the addition of 0.1 nM dihydrotestosterone (DHT) led to a decrease in the amount of mucin-1 and thus increased adherence. Scale bars: 300  $\mu$ m.

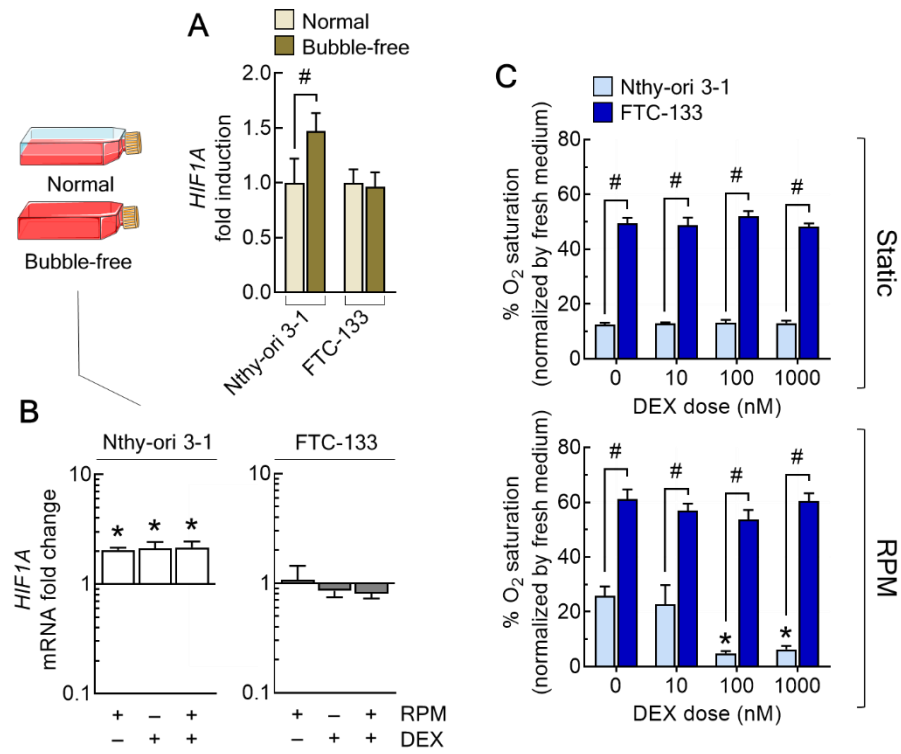

**Figure S3.** Oxygen saturation and hypoxia-induced expression of *HIF1A* in completely filled cell culture flasks. **(A)** Expression levels (mRNA) of the *HIF1A* gene ( $n=5$ ); **(B)** Fold changes of *HIF1A* expression under the different culture conditions ( $n=5$ ); **(C)** Oxygen levels in completely filled cell culture flasks after 72 h ( $n=3$ ). \*  $p < 0.05$  vs. control condition (-DEX/-RPM); #  $p < 0.05$ .

**Table S1.** Antibodies used for immunofluorescence and Western blot analyses.

| Antibody (anti-...)    | Company, Product Nr.    | Species <sup>1</sup> | MW (kDa) | Dilution IF <sup>2</sup> | Dilution WB <sup>2</sup> |
|------------------------|-------------------------|----------------------|----------|--------------------------|--------------------------|
| β-catenin              | Invitrogen, #71-2700    | Rb                   | 94       | 3 µg/mL                  |                          |
| Claudin-1              | Invitrogen, #37-4900    | Ms                   |          | 3 µg/mL                  |                          |
| Collagen I             | Invitrogen, #MA1-26771  | Ms                   |          | 1:2000                   |                          |
| Collagen IV            | Invitrogen, #PA5-104508 | Rb                   |          | 1:300                    |                          |
| E-cadherin             | Invitrogen, #MA5-11496  | Ms                   |          | 2 µg/mL                  |                          |
| FAK                    | Abcam, #ab40794         | Rb                   |          | 1:1000                   |                          |
| Fibronectin            | Sigma, #F3648           | Rb                   |          | 1:400                    |                          |
| GAPDH                  | Invitrogen, #398600     | Ms                   | ~37      |                          | 1:2000                   |
| GR                     | Sigma, #HPA004248       | Rb                   | ~110     | 1 µg/mL                  | 1:2000                   |
| Integrin-β1            | R&D Systems, #MAB17781  | Ms                   |          | 1:500                    | 25 µg/mL                 |
| Laminin                | Invitrogen, #PA1-16730  | Rb                   |          | 1:100                    |                          |
| MMP-2                  | Invitrogen, #436000     | Ms                   | 72       |                          | 2 µg/mL                  |
| MMP-9                  | Invitrogen, #MA5-32705  | Ms                   | ~100     |                          | 1:500                    |
| Mucin-1                | Invitrogen, #MA1-35039  | Ms                   |          | 1:100                    |                          |
| p38 MAPKα              | Invitrogen, #MA5-15116  | Ms                   | 46       | 1:1000                   | 1:1000                   |
| p-GR (Ser 211)         | Invitrogen, #PA5-17668  | Rb                   | ~86      |                          | 1:500                    |
| p-p38 (Thr180, Tyr182) | Invitrogen, #44-684G    | Rb                   | ~38      |                          | 1:500                    |
| ZO-1                   | Invitrogen, #40-2200    | Rb                   |          | 3.5 µg/mL                |                          |
| ZO-2                   | Invitrogen, #71-1400    | Rb                   |          | 1 µg/mL                  |                          |

| Secondary Antibody | Company, Product Nr. | Labelling <sup>3</sup> | Dilution IF <sup>2</sup> | Dilution WB <sup>2</sup> |          |
|--------------------|----------------------|------------------------|--------------------------|--------------------------|----------|
|                    |                      |                        |                          | Prim. AB                 | Factor   |
| anti-Mouse         | Invitrogen, #A-11001 | AF488                  | 1 µg/mL                  |                          |          |
|                    | Invitrogen, #A-21235 | AF647                  | 2 µg/mL                  |                          |          |
|                    | Invitrogen, #31430   | HRP                    |                          | p38 MAPKα                | 1:6000   |
|                    |                      |                        |                          | GAPDH                    | 1:50,000 |
|                    |                      |                        |                          | MMP-2                    | 1:2000   |
| anti-Rabbit        | Invitrogen, #A-11008 | AF488                  | 4 µg/mL                  |                          |          |
|                    | Invitrogen, #A-21244 | AF647                  | 4 µg/mL                  |                          |          |
|                    | Invitrogen, #31460   | HRP                    |                          | MMP-9                    | 1:1000   |
|                    |                      |                        |                          | GR                       | 1:10,000 |
|                    |                      |                        |                          | p-GR                     | 1:10,000 |
|                    |                      |                        |                          | p-p38                    | 1:10,000 |

<sup>1</sup> Ms: mouse; Rb: rabbit; <sup>2</sup> IF, immunofluorescence; WB, Western blot; <sup>3</sup> AF, Alexa Fluor; HRP, horseradish peroxidase.

**Table S2.** Primer sequences for quantitative real-time PCR.

| <b>Gene</b>     | <b>Primer Name</b> | <b>Sequence (5'→3')</b>   |
|-----------------|--------------------|---------------------------|
| <i>18S rRNA</i> | 18S-F              | GGAGCCTGCGGCTTAATTT       |
|                 | 18S-R              | CAACTAAGAACGGCCATGCA      |
| <i>CXCL8</i>    | CXCL8-F            | TGGCAGCCTTCCTGATTTCT      |
|                 | CXCL8-R            | GGGTGGAAGGTTTGGAGTATG     |
| <i>DUSP1</i>    | DUSP1-F            | AGGACAACCACAAGGCAGAC      |
|                 | DUSP1-R            | TCCAGCATTCTTGATGGAGTCTATG |
| <i>FKBP5</i>    | FKBP5-F            | AACCCCCAGAATAAGGCTGC      |
|                 | FKBP5-R            | TTGGCGTATATCCTGCGGTC      |
| <i>HIF1A</i>    | HIF1A-F            | TGCTTTAACTTTGCTGGCCC      |
|                 | HIF1A-R            | AGTTTCTGTGTCGTTGCTGC      |
| <i>IL1B</i>     | IL1B-F             | TTCGAGGCACAAGGCACAA       |
|                 | IL1B-R             | TGGCTGCTTCAGACACTTGAG     |
| <i>IL6</i>      | IL6-F              | CGGGAACGAAAGAGAAGCTCTA    |
|                 | IL6-R              | GAGCAGCCCCAGGGAGAA        |
| <i>MAPK14</i>   | MAPK14-F           | TGTTTCCTGGTACAGACCATATT   |
|                 | MAPK14-R           | CATGGCTTGGCATCCTGTT       |
| <i>MUC1</i>     | MUC1-F             | CCTCACAGTGCTTACAGTTGTT    |
|                 | MUC1-R             | GCTGGGCACTGAACTTCTCT      |
| <i>MYC</i>      | MYC-F              | GGATTCTCTGCTCTCCTCGAC     |
|                 | MYC-R              | CTTCTTGTTCCCTCCTCAGAGTC   |
| <i>NR3C1</i>    | NR3C1-F            | GTTGTTTATCTCGGCTGCGG      |
|                 | NR3C1-R            | TCAGTGAATATCAACTCTGGCA    |
